# Supplementary material for: Vitamin D Analogs Regulate the Vitamin D System and Cell Viability in Ovarian Cancer Cells
Source: MDPI journal article supplement (doi:10.3390/ijms23010172), 2021-12-24
Supplement: s1 [file s1]

**Table S1.** Increase in CYP24A1 expression in the 13781 cells used to calculate ratios in Table 1 of the main manuscript.

| <b>13781</b>      | <b>1 nmol/l for 4 h<sup>1</sup></b> | <b>100 nmol/l for 4 h<sup>1</sup></b> | <b>100 nmol/l for 5 days<sup>1</sup></b> |
|-------------------|-------------------------------------|---------------------------------------|------------------------------------------|
|                   | Mean % $\pm$ SD                     | Mean % $\pm$ SD                       | Mean % $\pm$ SD                          |
| <b>Calcitriol</b> | 277 $\pm$ 146                       | 29,752 $\pm$ 14,351                   | 1,143,611 $\pm$ 437,431                  |
| <b>PRI-1906</b>   | 1,461 $\pm$ 1,188                   | 42,447 $\pm$ 25,012                   | 1,318,811 $\pm$ 90,432                   |
| <b>PRI-1907</b>   | 104 $\pm$ 35                        | 4,282 $\pm$ 667                       | 1,285,482 $\pm$ 91,310                   |
| <b>PRI-5201</b>   | 1,387 $\pm$ 961                     | 28,577 $\pm$ 13,838                   | 1,317,940 $\pm$ 148,390                  |
| <b>PRI-5202</b>   | 9,806 $\pm$ 3,586                   | 38,880 $\pm$ 20,950                   | 1,237,736 $\pm$ 230,694                  |

<sup>1</sup>Values are presented as CYP24A1 expression increase from the basal level (% ethanol control).

**Table S2.** Increase in CYP24A1 expression in the 14433 cells used to calculate ratios in Table 1 of the main manuscript.

| <b>14433</b>      | <b>1 nmol/l for 4 h<sup>1</sup></b> | <b>100 nmol/l for 4 h<sup>1</sup></b> | <b>100 nmol/l for 5 days<sup>1</sup></b> |
|-------------------|-------------------------------------|---------------------------------------|------------------------------------------|
|                   | Mean % $\pm$ SD                     | Mean % $\pm$ SD                       | Mean % $\pm$ SD                          |
| <b>Calcitriol</b> | 180 $\pm$ 54                        | 3,976 $\pm$ 1,581                     | 47,169 $\pm$ 40,888                      |
| <b>PRI-1906</b>   | 725 $\pm$ 260                       | 4,994 $\pm$ 2,076                     | 104,824 $\pm$ 43,531                     |
| <b>PRI-1907</b>   | 112 $\pm$ 32                        | 1,715 $\pm$ 655                       | 96,334 $\pm$ 34,603                      |
| <b>PRI-5201</b>   | 777 $\pm$ 474                       | 3,585 $\pm$ 1,285                     | 106,062 $\pm$ 53,173                     |
| <b>PRI-5202</b>   | 1,691 $\pm$ 1,022                   | 4,577 $\pm$ 2,140                     | 97,410 $\pm$ 49,649                      |

<sup>1</sup>Values are presented as CYP24A1 expression increase from the basal level (% ethanol control).

**Table S3.** Effect of the compounds on VDR and Ki67 protein levels, relative to ethanol control. In contrast, figure 6 shows the actual mean grey value (= fluorescence intensity) for VDR and figure 8 shows the actual percentage of Ki67 positive cells of all cells.

|                   | <b>13781</b>    |                 | <b>14433</b>    |                 |
|-------------------|-----------------|-----------------|-----------------|-----------------|
|                   | <b>VDR</b>      | <b>Ki67</b>     | <b>VDR</b>      | <b>Ki67</b>     |
|                   | Mean % $\pm$ SD |
| <b>Ethanol</b>    | 100 $\pm$ 34    | 100 $\pm$ 13    | 100 $\pm$ 23    | 100 $\pm$ 18    |
| <b>Calcitriol</b> | 120 $\pm$ 36    | 83 $\pm$ 30     | 110 $\pm$ 17    | 100 $\pm$ 17    |
| <b>PRI-1906</b>   | 122 $\pm$ 38    | 92 $\pm$ 21     | 111 $\pm$ 27    | 101 $\pm$ 15    |
| <b>PRI-1907</b>   | 115 $\pm$ 30    | 90 $\pm$ 21     | 104 $\pm$ 14    | 100 $\pm$ 16    |
| <b>PRI-5201</b>   | 125 $\pm$ 27    | 92 $\pm$ 21     | 122 $\pm$ 27    | 104 $\pm$ 15    |
| <b>PRI-5202</b>   | 135 $\pm$ 46    | 99 $\pm$ 27     | 114 $\pm$ 17    | 103 $\pm$ 16    |

Values are presented as % mean ethanol control.

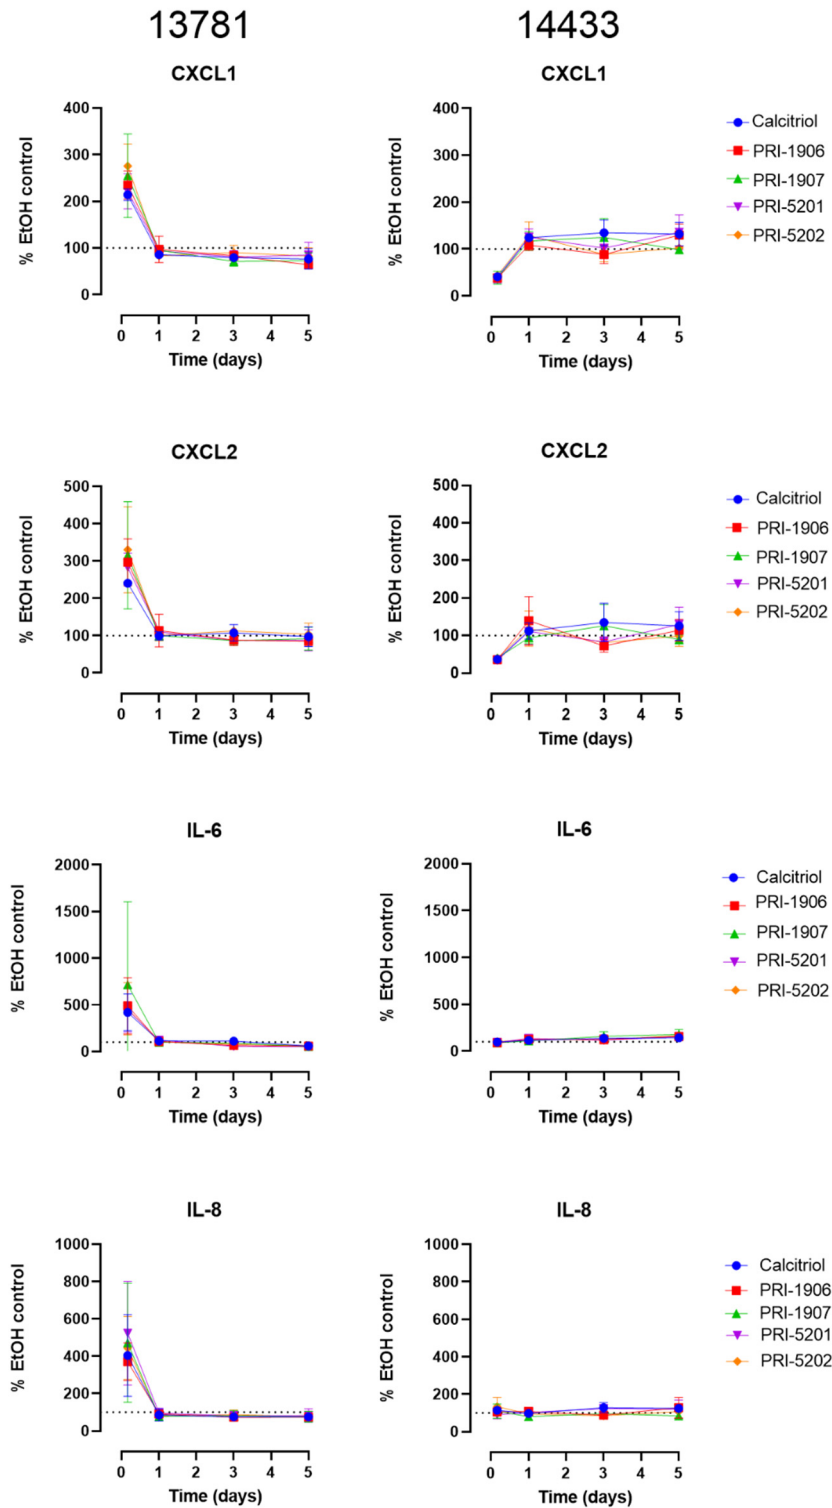

**Figure S1.** Gene expression in 13781 and 14433 cells after treatment with an1,25Ds at 100 nmol/l at different time points (4 hours, 1 day, 3, and 5 days). The diagrams show the percentage increase compared with the ethanol control. N = 3.
